# Supplementary material for: Nutritional and Functional Properties of Fermented Mixed Grains by Solid-State Fermentation with Bacillus amyloliquefaciens 245
Source: Foods. 2020 Nov 19;9(11):1693. doi: 10.3390/foods9111693 (PMC7699218; doi:10.3390/foods9111693)
Supplement: Supplementary file 1 [file foods-09-01693-s001.xlsx]

## Sheet: Figure 2 HeatMap
HCA							※The background color of cells are same as HeatMap in newer version of MS Excel 2007.
Line	ID	HMT DB †			m/z	MT/RT	Standardized Relative Area §
		Compound name	KEGG ID	HMDB ID			MG	FMG-0hr	FMG-8hr	FMG-12hr	FMG-36hr
1	C_0018	Azetidine 2-carboxylic acid	C08267	No ID	102.055	8.86856	1.47422	-0.69558	-0.69558	-0.69558	0.612521
2	C_0068	N-Ethylmaleimide_+H2O	C02441	No ID	144.065	20.5806	1.78885	-0.447214	-0.447214	-0.447214	-0.447214
3	C_0166	Glutathione (GSH)	C00051	HMDB00125	308.09	12.848	1.78885	-0.447214	-0.447214	-0.447214	-0.447214
4	A_0036	Phenylpyruvic acid	C00166	HMDB00205	163.042	8.72875	1.78885	-0.447214	-0.447214	-0.447214	-0.447214
5	C_0170	Cysteine glutathione disulfide	C05526	HMDB00656	427.093	11.4215	1.78885	-0.447214	-0.447214	-0.447214	-0.447214
6	C_0147	γ-Glu-Cys	C00669	HMDB01049	251.07	12.4288	1.78885	-0.447214	-0.447214	-0.447214	-0.447214
7	C_0165	Glutathione (GSSG)_divalent	C00127	HMDB03337	307.082	11.913	1.77867	-0.301088	-0.38323	-0.547177	-0.547177
8	A_0119	Sucrose 6'-phosphate	C02591	No ID	421.077	8.58689	1.62762	-0.591956	0.307599	-0.628981	-0.714284
9	C_0113	Phosphorylcholine	C00588	HMDB01565	184.072	19.162	1.55717	0.170001	-0.239996	-0.306035	-1.18114
10	A_0025	Malic acid	C00149,C00497,C00711	HMDB00156,HMDB00744	133.015	21.3142	1.69469	0.129123	-0.640376	-0.569359	-0.61408
11	C_0057	Asn	C00152,C01905,C16438	HMDB00168	133.06	10.3433	1.60957	0.352574	-0.676778	-0.621659	-0.663703
12	C_0151	Glycerophosphocholine	C00670	HMDB00086	258.109	20.0243	1.40308	0.689664	-0.461476	-0.737406	-0.893864
13	A_0065	Citric acid	C00158	HMDB00094	191.02	26.1844	1.50042	0.559302	-0.587916	-0.795745	-0.676063
14	A_0064	Isocitric acid	C00311	HMDB00193	191.02	28.5736	1.43262	0.679096	-0.703904	-0.703904	-0.703904
15	A_0066	Quinic acid	C00296	HMDB03072	191.057	8.22986	1.31763	0.842068	-0.7199	-0.7199	-0.7199
16	C_0085	Allantoin	C01551	HMDB00462	159.052	20.293	1.15541	1.03044	-0.65135	-0.738949	-0.795555
17	C_0025	Hypotaurine	C00519	HMDB00965	110.026	17.1908	0.982902	1.20144	-0.728114	-0.728114	-0.728114
18	A_0013	Fumaric acid	C00122	HMDB00134	115.004	25.315	1.05023	1.1133	-0.848521	-0.466486	-0.848521
19	C_0105	Arg	C00062,C00792	HMDB00517,HMDB03416	175.118	7.18576	1.19358	0.977666	-0.789195	-0.546699	-0.835355
20	C_0014	β-Ala	C00099	HMDB00056	90.0557	7.40342	1.21882	0.93343	-0.845943	-0.460367	-0.845943
21	A_0018	5-Oxoproline	C01879	HMDB00267	128.036	9.46603	1.26182	0.857642	-0.984527	-0.3958	-0.739131
22	C_0016	Glycerol	C00116	HMDB00131	93.0546	20.2976	1.15689	0.973119	-1.0331	-0.69967	-0.397244
23	C_0110	Theobromine	C07480	HMDB02825	181.071	20.3018	1.09862	1.01628	-0.556746	-1.12282	-0.435337
24	C_0024	Diethanolamine	C06772	HMDB04437	106.086	7.70664	0.96949	1.06589	-0.399616	-1.27963	-0.356131
25	C_0041	5-Methylcytosine	C02376	HMDB02894	126.064	7.85448	0.750498	1.13712	0.169135	-1.02837	-1.02837
26	C_0119	Nω-Methylarginine	No ID	No ID	189.134	7.52064	1.13464	0.837313	0.00888033	-0.832991	-1.14784
27	C_0152	Thiamine	C00378	HMDB00235	265.111	6.68802	0.877104	1.15624	-0.164062	-0.68994	-1.17935
28	C_0020	GABA	C00334	HMDB00112	104.07	7.7394	0.634556	1.45743	-0.634744	-0.663285	-0.793963
29	A_0061	Azelaic acid	C08261	HMDB00784	187.098	12.0771	0.378981	1.58084	-0.797895	-0.732051	-0.429872
30	C_0150	Dyphylline	C07819	No ID	255.107	20.3512	0.130613	1.50494	-1.09977	-0.695122	0.159338
31	C_0006	Gly	C00037	HMDB00123	76.0398	8.32656	0.885018	0.341605	-1.72454	0.281111	0.216803
32	C_0023	Ser	C00065,C00716,C00740	HMDB00187,HMDB03406	106.05	9.88987	0.834793	0.308704	-1.56275	0.791759	-0.372508
33	A_0007	Lactic acid	C00186,C00256,C01432	HMDB00190,HMDB01311	89.0255	10.7071	-0.137575	0.896091	-1.02268	1.15612	-0.891961
34	C_0109	Mannosamine	C03570	No ID	180.086	8.98086	-1.0934	1.18049	-0.802941	0.862897	-0.14704
35	C_0153	2'-Deoxyguanosine	C00330	HMDB00085	268.103	11.2527	-0.971293	1.44696	-0.660378	0.597195	-0.412487
36	C_0061	Adenine	C00147	HMDB00034	136.061	7.67687	-0.727051	1.35361	-0.677227	0.793197	-0.742526
37	C_0143	Thymidine	C00214	HMDB00273	243.1	20.3574	-0.309891	1.4774	-0.311101	0.364809	-1.22122
38	C_0100	Pyridoxine	C00314	HMDB00239	170.081	8.64809	0.208846	1.38751	-0.0389961	-0.139534	-1.41782
39	C_0102	XC0040	-	-	174.086	11.9189	-0.681127	1.34238	0.524803	0.0215028	-1.20756
40	A_0101	cAMP	C00575	HMDB00058	328.044	7.56785	-0.952347	1.42178	0.39639	0.0865232	-0.952347
41	C_0160	Guanosine	C00387	HMDB00133	284.098	12.1712	-0.764702	1.62679	-0.529088	0.29901	-0.632012
42	A_0031	2-Oxoglutaric acid	C00026	HMDB00208	145.014	21.4548	-0.608734	1.69439	-0.608734	0.131814	-0.608734
43	A_0095	cCMP 2',3'-cCMP	C00941 C02354	No ID HMDB11691	304.035	7.61211	-0.591842	1.71629	-0.591842	0.0592333	-0.591842
44	C_0144	Cytidine	C00475	HMDB00089	244.092	9.61957	-0.458292	1.72822	-0.524983	-0.0188068	-0.726136
45	C_0154	Adenosine	C00212	HMDB00050	268.103	9.79605	-0.180155	1.75816	-0.541862	-0.366435	-0.669712
46	A_0012	Glyceric acid	C00258	HMDB00139,HMDB06372	105.02	10.3448	0.0354424	1.72063	-0.503119	-0.619239	-0.633713
47	A_0045	cis-Aconitic acid	C00417	HMDB00072	173.011	27.7749	-0.292148	1.77383	-0.363933	-0.633185	-0.484565
48	C_0001	Trimethylamine	C00565	HMDB00906	60.0814	5.98568	-0.447214	1.78885	-0.447214	-0.447214	-0.447214
49	A_0080	Sinapic acid	C00482	No ID	223.061	7.94508	-0.447214	1.78885	-0.447214	-0.447214	-0.447214
50	C_0148	2'-Deoxyadenosine 5'-Deoxyadenosine	C00559 C05198	HMDB00101 HMDB01983	252.107	9.5794	-0.574009	1.77423	-0.373965	-0.269248	-0.557012
51	C_0145	Uridine	C00299	HMDB00296	245.077	20.3691	-0.544073	1.76638	-0.64667	-0.285557	-0.290083
52	A_0109	GMP	C00144	HMDB01397	362.053	9.12158	-0.693501	1.76269	-0.214338	-0.409604	-0.445251
53	A_0098	CMP	C00055	HMDB00095	322.046	9.55181	-0.801808	1.73348	-0.111494	-0.369097	-0.451084
54	A_0100	UMP	C00105	HMDB00288	323.03	9.7361	-0.795192	1.72678	-0.0759094	-0.344034	-0.511645
55	A_0102	dAMP	C00360	HMDB00905	330.062	9.35675	-0.568826	1.74017	-0.0336888	-0.568826	-0.568826
56	C_0046	XC0017	-	-	130.097	7.87493	-0.37877	1.67458	-0.00150363	-0.319508	-0.974798
57	A_0096	dCMP	C00239	HMDB01202	306.049	9.70434	-0.728407	1.6899	0.0506681	-0.283754	-0.728407
58	A_0097	dTMP	C00364	HMDB01227	321.05	9.5218	-0.842086	1.58038	0.250387	-0.146594	-0.842086
59	A_0105	cGMP	C00942	HMDB01314	344.041	7.67944	-0.907283	1.62536	0.0455221	-0.0343448	-0.72925
60	A_0021	4-Methyl-2-oxovaleric acid 3-Methyl-2-oxovaleric acid	C00233 C00671,C03465	HMDB00695 HMDB00491	129.056	9.50625	-1.17887	1.53099	0.230265	-0.143341	-0.43904
61	A_0099	3'-CMP 2'-CMP	C05822 C03104	No ID HMDB11692	322.047	9.69142	-0.966098	1.66945	-0.080518	-0.112491	-0.510344
62	C_0138	2'-Deoxycytidine	C00881	HMDB00014	228.096	9.39241	-0.978149	1.6859	-0.347072	-0.0924522	-0.26823
63	C_0108	Galactosamine Glucosamine	C02262 C00329	No ID HMDB01514	180.086	9.25555	-1.15692	1.52304	-0.54465	-0.0318122	0.210343
64	A_0068	Glucuronic acid-1 Galacturonic acid-1	- -	- -	193.036	8.05874	-0.760319	1.63294	-0.376848	-0.743117	0.247342
65	A_0106	AMP	C00020	HMDB00045	346.058	9.24236	-1.06343	1.61608	-0.0906345	-0.497912	0.0358978
66	C_0066	Tyramine	C00483	HMDB00306	138.091	8.31538	-1.22136	1.51856	0.140796	-0.426972	-0.0110218
67	A_0028	p-Hydroxybenzoic acid	C00156	HMDB00500	137.025	9.34972	-1.05191	1.30267	0.700598	-0.831461	-0.119899
68	A_0052	Pyrophosphate	C00013	HMDB00250	176.937	16.6514	-0.729924	1.04972	1.14005	-0.729924	-0.729924
69	C_0101	1-Methylhistidine 3-Methylhistidine	No ID C01152	HMDB00001 HMDB00479	170.092	7.56303	0.319235	0.630466	1.12324	-0.823884	-1.24906
70	C_0092	O-Acetylhomoserine 2-Aminoadipic acid	C01077 C00956	No ID HMDB00510	162.077	10.8281	0.793373	0.0219705	0.327753	0.570669	-1.71377
71	A_0074	6,8-Thioctic acid	C00725	HMDB01451	205.037	8.20748	-0.204767	0.806419	0.687702	0.356225	-1.64558
72	C_0022	Choline	C00114	HMDB00097	104.107	6.92688	-0.24189	0.260601	0.985687	0.592696	-1.59709
73	C_0038	Betaine aldehyde_+H2O	C00576	HMDB01252	120.102	7.52854	-1.07561	0.415994	0.806127	0.929102	-1.07561
74	C_0133	β-Ala-Lys	C05341	No ID	218.147	6.88028	-1.00537	0.0658528	0.768933	1.17595	-1.00537
75	A_0107	3'-AMP	C01367	HMDB03540	346.058	9.71178	-1.04472	0.293976	0.653985	1.14149	-1.04472
76	A_0081	Ribulose 5-phosphate	C00199,C01101	HMDB00618	229.012	10.92	-1.23342	0.845683	0.306286	0.953513	-0.872061
77	C_0071	Acetylcholine	C01996	HMDB00895	146.117	7.66188	-1.08792	0.747005	0.878794	0.550046	-1.08792
78	A_0014	2-Oxoisovaleric acid	C00141	HMDB00019	115.041	10.1738	-1.03202	0.43538	1.23508	0.393579	-1.03202
79	A_0089	Fructose 6-phosphate	C05345,C00085	HMDB00124	259.024	9.91488	-1.4923	0.809997	0.983075	0.0790445	-0.379815
80	A_0087	Glucose 6-phosphate	C00668,C01172,C00092	HMDB01401	259.024	9.79475	-1.52737	0.4073	1.15422	0.273145	-0.307294
81	A_0043	Glycerol 3-phosphate	C00093	HMDB00126	171.006	12.0659	-1.67358	0.330797	0.579638	0.862464	-0.0993141
82	C_0167	XC0126	-	-	310.113	14.3935	-0.813591	0.0457671	-0.602383	1.69366	-0.323454
83	C_0156	Inosine	C00294	HMDB00195	269.087	18.247	-0.836063	-0.452345	-0.495209	1.68569	0.0979241
84	A_0016	Succinic acid	C00042	HMDB00254	117.02	20.9093	-0.484018	-0.614614	-0.642051	1.72496	0.0157193
85	C_0088	Daminozide-2	-	-	161.092	8.95818	-0.447214	-0.447214	-0.447214	1.78885	-0.447214
86	C_0114	Normetanephrine	C05589	HMDB00819	184.097	9.14712	-0.447214	-0.447214	-0.447214	1.78885	-0.447214
87	C_0076	O-Acetylserine	C00979	HMDB03011	148.059	12.2947	-0.601845	-0.601845	-0.167443	1.7597	-0.388566
88	C_0134	trans-Zeatin	C00371	No ID	220.119	9.48623	-0.713947	-0.713947	-0.0469829	1.70974	-0.234859
89	A_0110	XA0055	-	-	369	14.2601	-0.650324	-0.650324	0.332021	1.61895	-0.650324
90	A_0029	XA0004	-	-	144.031	9.28743	-0.729678	-0.729678	1.03631	1.15273	-0.729678
91	A_0104	Fructose 1,6-diphosphate	C00354	HMDB01058	338.99	14.5392	-0.730289	-0.730289	1.0888	1.10206	-0.730289
92	C_0091	N-Methylglutamic acid	C01046	No ID	162.076	12.482	-0.730293	-0.730293	1.09998	1.0909	-0.730293
93	C_0004	Aminoacetone	C01888	HMDB02134	74.0599	6.50623	-0.447214	-0.447214	1.78885	-0.447214	-0.447214
94	C_0009	Piperidine	C01746	No ID	86.0956	7.52351	-0.631439	-0.631439	1.65766	-0.631439	0.236654
95	A_0017	2-Hydroxyvaleric acid	No ID	HMDB01863	117.056	9.21549	-1.01976	-0.67645	1.50076	0.43768	-0.242231
96	A_0058	3-Phosphoglyceric acid	C00197	HMDB00807	184.986	19.6302	-1.23175	-0.766565	1.18027	0.698451	0.119588
97	A_0116	CDP	C00112	HMDB01546	402.012	11.4016	-1.04687	-1.04687	1.15968	0.58331	0.350754
98	A_0091	6-Phosphogluconic acid	C00345	HMDB01316	275.018	14.5969	-1.05771	-1.05771	1.03139	0.777761	0.30628
99	C_0171	Loperamide	C07080	HMDB04999	477.23	11.9535	-1.06902	-1.06902	0.981701	0.780804	0.375527
100	C_0168	Tyr-Glu	No ID	No ID	311.126	10.9648	-1.08361	-1.08361	0.936526	0.70802	0.52268
101	C_0055	6-Aminohexanoic acid	C02378	HMDB01901	132.102	8.27263	-1.33293	-0.78074	0.776081	0.910544	0.427041
102	C_0051	3-Guanidinopropionic acid	C03065	No ID	132.076	8.04529	-1.42411	-0.621031	0.542877	1.0367	0.465569
103	A_0050	2-Isopropylmalic acid	C02504	HMDB00402	175.062	13.7257	-1.34141	-0.689501	0.48486	1.15706	0.38899
104	C_0157	Glu-Glu	C01425	No ID	277.105	10.7488	-1.2148	-0.867496	0.249017	1.03759	0.795689
105	C_0139	γ-Glu-2-aminobutyric acid	No ID	No ID	233.112	12.0481	-1.13494	-0.917544	0.223899	1.18635	0.642236
106	A_0063	N-Acetylmethionine	C02712	HMDB11745	190.055	8.11648	-1.04537	-1.04537	0.264121	1.10868	0.717948
107	C_0164	Arg-Glu	No ID	No ID	304.162	7.5742	-1.05367	-1.06534	0.703691	1.06688	0.348435
108	C_0078	Glu	C00025,C00217,C00302	HMDB00148,HMDB03339	148.06	10.7746	-1.03077	-1.04139	0.430578	1.22094	0.420645
109	C_0140	Thr-Asp-1	-	-	235.091	10.2737	-1.00706	-1.00706	0.443622	1.30565	0.264846
110	A_0093	Sedoheptulose 7-phosphate	C05382	HMDB01068	289.033	9.57336	-0.992046	-0.992046	0.476237	1.33189	0.175967
111	C_0115	Adrenaline	C00788	HMDB00068	184.097	9.26315	-0.915515	-0.915515	0.0512823	1.49703	0.282716
112	A_0123	GDP	C00035	HMDB01201	442.018	10.5737	-0.239545	-1.65215	0.514928	0.679876	0.696887
113	A_0132	NAD+	C00003	HMDB00902	662.104	6.57622	-0.423703	-1.52754	0.294354	0.710484	0.946402
114	C_0017	1-Aminocyclopropane-1-carboxylic acid Homoserinelactone	C01234 No ID	No ID No ID	102.055	7.14492	-1.00747	-1.00747	0.0593971	0.812865	1.14268
115	A_0056	O-Phosphoserine	C01005	HMDB00272	184.003	12.2203	-0.989276	-0.989276	-0.00341808	0.792802	1.18917
116	C_0163	5'-Deoxy-5'-methylthioadenosine	C00170	HMDB01173	298.097	9.99957	-0.986975	-0.916525	-0.118848	0.759387	1.26296
117	A_0083	2-Deoxyglucose 6-phosphate	C06369	No ID	243.028	10.1357	-0.923642	-0.923642	-0.165217	0.658836	1.35367
118	C_0058	Ornithine	C00077,C00515,C01602	HMDB00214,HMDB03374	133.097	6.89562	-1.01627	-0.870369	-0.0946328	0.645693	1.33558
119	C_0010	Ethylacetimidate	No ID	No ID	88.0757	7.16569	-1.09096	-0.811594	-0.0243551	0.580029	1.34688
120	C_0103	N-Acetylornithine	C00437	HMDB03357	175.106	9.52611	-1.09069	-0.849453	0.0439009	0.56796	1.32828
121	A_0054	4-Pyridoxic acid	C00847	HMDB00017	182.047	8.72335	-1.05807	-0.996585	0.241551	0.60219	1.21092
122	C_0080	N6-Methyladenine	C08434	HMDB02099	150.077	8.19299	-1.04411	-1.04411	0.348888	0.565248	1.17408
123	A_0002	Propionic acid	C00163	HMDB00237	73.0299	10.847	-1.06254	-1.06254	0.328412	0.797849	0.99881
124	C_0149	XC0089	-	-	255.096	9.47872	-1.08407	-1.08407	0.532108	0.699381	0.93665
125	A_0122	ADP	C00008	HMDB01341	426.024	10.8233	-0.879319	-1.11763	0.677945	0.0902098	1.2288
126	A_0079	Pantothenic acid	C00864	HMDB00210	218.105	7.65821	-1.0178	-0.769442	0.822719	-0.301964	1.26649
127	A_0133	Deamido-NAD+	C00857	HMDB01179	663.087	8.30285	-0.969562	-0.969562	0.854594	-0.0907689	1.1753
128	C_0074	Gln	C00064,C00303,C00819	HMDB00641,HMDB03423	147.076	10.6114	-1.09299	-1.02712	0.765926	0.325766	1.02842
129	A_0117	UDP	C00015	HMDB00295	402.997	11.5803	-1.06575	-1.06575	0.991624	0.351563	0.788314
130	C_0081	Guanine	C00242	HMDB00132	152.056	8.32659	-1.30899	-0.731403	1.07735	0.229335	0.73371
131	C_0073	Spermidine	C00315	HMDB01257	146.164	4.64805	-1.72005	0.47366	0.450061	0.0125249	0.783807
132	A_0049	Allantoic acid	C00499	HMDB01209	175.048	8.72337	-1.5535	0.491993	0.314081	-0.321494	1.06892
133	C_0131	Lipoamide	C00248	HMDB00962	206.069	20.5036	-1.57201	0.482174	0.254352	-0.246556	1.08204
134	C_0005	1,3-Diaminopropane	C00986	HMDB00002	75.0909	4.53658	-1.63018	0.41835	0.095295	0.0410192	1.07552
135	C_0011	Putrescine	C00134	HMDB01414	89.1073	4.83605	-1.57519	-0.0959406	0.447612	0.0822716	1.14125
136	A_0055	Chelidonic acid	C08476	No ID	182.994	19.344	-1.68195	-0.0322257	0.51466	0.295017	0.904494
137	A_0067	Glucuronic acid-2 Galacturonic acid-2	- -	- -	193.035	8.21341	-1.63932	-0.211981	0.538	0.415957	0.897344
138	C_0158	Saccharopine	C00449	HMDB00279	277.138	10.5958	-1.6034	-0.357407	0.711676	0.538725	0.710403
139	A_0088	myo-Inositol 1-phosphate myo-Inositol 3-phosphate	C01177 C04006	HMDB00213 HMDB06814	259.024	10.2375	-1.62028	-0.318988	0.550597	0.747242	0.641425
140	C_0029	Uracil	C00106	HMDB00300	113.035	20.276	-1.64374	-0.245294	0.452298	0.693366	0.743375
141	C_0159	1-Methyladenosine	C02494	HMDB03331	282.118	9.92721	-1.50132	-0.228271	0.0946569	0.400047	1.23488
142	C_0135	XC0065	-	-	221.092	12.7212	-1.4694	-0.212075	-0.136857	0.660169	1.15816
143	C_0077	N-Acetylserine	No ID	HMDB02931	148.06	21.1666	-1.32863	-0.513468	-0.108266	0.805727	1.14463
144	A_0120	Trehalose 6-phosphate	C00689	HMDB01124	421.077	8.41837	-0.93727	-0.93727	-0.217008	0.979939	1.11161
145	A_0075	N-Acetylphenylalanine	C03519	HMDB00512	206.083	7.9376	-0.842717	-0.842717	-0.477283	1.00017	1.16255
146	A_0023	N-Acetylalanine	No ID	HMDB00766	130.051	8.8688	-0.906511	-0.707633	-0.551579	1.20135	0.964377
147	C_0136	Cystathionine	C00542,C02291	HMDB00099	223.076	9.82254	-0.730294	-0.730294	-0.730294	1.0995	1.09138
148	A_0131	UDP-N-acetylgalactosamine UDP-N-acetylglucosamine	C00203 C00043	HMDB00304 HMDB00290	606.077	8.42024	-0.728513	-0.728513	-0.728513	1.19154	0.993998
149	A_0078	O-Succinylhomoserine	C01118	No ID	218.068	12.176	-0.72696	-0.72696	-0.72696	1.22547	0.95541
150	C_0035	Thr	C00188,C00820	HMDB00167	120.065	10.3858	-0.693381	-0.56752	-0.804587	1.48918	0.576311
151	C_0141	Thr-Asp-2 Ser-Glu	- No ID	- No ID	235.092	10.4922	-0.880541	-0.273726	-0.880541	1.40737	0.627435
152	C_0086	Betonicine	C08269	No ID	160.097	12.3918	-0.932453	-0.160448	-0.932453	1.31623	0.709124
153	C_0112	β-Tyr	C04368	HMDB03831	182.08	9.51447	-0.973457	-0.0886472	-0.973457	1.12992	0.905636
154	C_0003	XC0001	-	-	72.0814	6.48421	-1.07206	0.533469	-1.07206	0.560665	1.04998
155	C_0121	Homocitrulline	C02427	HMDB00679	190.118	10.9978	-0.898047	-0.0360672	-0.898047	0.321388	1.51077
156	C_0072	γ-Butyrobetaine	C01181	HMDB01161	146.118	8.13009	-0.226598	-0.36163	-0.97917	-0.119279	1.68668
157	A_0046	N-Acetylasparagine	No ID	HMDB06028	173.056	8.42019	0.0422669	-0.587756	-0.587756	-0.587756	1.721
158	A_0069	Gluconic acid	C00257	HMDB00625	195.052	8.11938	0.112967	-0.392621	-0.813328	-0.588031	1.68101
159	C_0107	Gluconolactone	C00198	HMDB00150	179.054	20.9002	0.504993	-0.22649	-1.14292	-0.571234	1.43565
160	A_0015	Hexanoic acid	C01585	HMDB00535	115.077	8.89563	0.0560084	0.252761	-1.02348	-0.789393	1.5041
161	C_0040	Nicotinic acid	C00253	HMDB01488	124.039	9.89655	-0.418851	0.691254	-0.832171	-0.837602	1.39737
162	A_0092	Xanthosine	C01762	HMDB00299	283.07	7.61567	-0.665667	0.385848	0.0251863	-1.17171	1.42635
163	C_0082	Xanthine	C00385	HMDB00292	153.04	18.1786	-0.681758	-0.211295	-0.157515	-0.681758	1.73233
164	C_0045	Pipecolic acid	C00408	HMDB00070,HMDB00716,HMDB05960	130.086	10.1758	-0.957074	-0.207331	0.193584	-0.639823	1.61064
165	C_0064	Trigonelline	C01004	HMDB00875	138.054	10.3255	-1.06852	-0.571134	0.457818	-0.310217	1.49206
166	C_0069	Stachydrine	C10172	HMDB04827	144.102	11.3174	-0.974372	-0.655993	0.373409	-0.290996	1.54795
167	C_0070	4-Guanidinobutyric acid	C01035	HMDB03464	146.091	8.31543	-0.893322	-0.52472	0.134864	-0.379485	1.66266
168	C_0008	Trimethylamine N-oxide	C01104	HMDB00925	76.0763	6.83315	-0.924436	-0.499406	0.00967696	-0.266567	1.68073
169	A_0077	Glucaric acid	C00767,C00818	HMDB00663	209.031	14.4979	-0.955576	-0.650439	0.181599	-0.186776	1.61119
170	A_0024	Glutaric acid	C00489	HMDB00661	131.036	16.7388	-1.14999	-0.531831	0.166431	-0.0229306	1.53832
171	C_0093	Carnitine	C00318,C00487,C15025	HMDB00062	162.112	8.52978	-1.157	-0.39802	0.105803	-0.124401	1.57362
172	C_0044	XC0016	-	-	129.065	8.78433	-1.10044	-0.32529	-0.0210778	-0.181065	1.62788
173	C_0034	Betaine	C00719	HMDB00043	118.086	11.0784	-0.90057	-0.457318	-0.172662	-0.177786	1.70834
174	A_0076	Mucic acid	C00879,C01807	HMDB00639	209.03	13.9666	-1.07949	-0.303206	-0.223596	-0.0343103	1.64061
175	A_0039	Uric acid	C00366	HMDB00289	167.022	8.88896	-1.37414	-0.158036	-0.00660213	0.0975254	1.44125
176	A_0085	myo-Inositol 2-phosphate	No ID	No ID	259.023	10.4432	-1.29631	-0.476128	0.0702125	0.285799	1.41643
177	A_0084	N-Acetyltryptophan	C03137	No ID	245.096	7.71578	-1.1122	-0.608809	-0.0143238	0.201905	1.53343
178	C_0162	Argininosuccinic acid	C03406	HMDB00052	291.128	9.38285	-1.16602	-0.581018	0.0500745	0.192561	1.5044
179	C_0116	N8-Acetylspermidine	C01029	HMDB02189	188.176	6.44794	-1.19657	-0.599286	0.280886	0.0565464	1.45842
180	A_0035	3-Hydroxy-3-methylglutaric acid	C03761	No ID	161.046	15.4553	-1.2062	-0.653178	0.29185	0.149461	1.41807
181	C_0062	Hypoxanthine	C00262	HMDB00157	137.045	10.8684	-1.2054	-0.742566	0.369004	0.2359	1.34306
182	A_0103	Ascorbate 2-glucoside	C18339	No ID	337.08	7.15904	-1.20488	-0.603277	0.512358	-0.0877225	1.38352
183	C_0132	Kynurenine	C00328,C01718	HMDB00684	209.092	9.7804	-0.736625	-1.03036	0.294898	-0.0466664	1.51875
184	C_0146	Pyridoxamine 5'-phosphate	C00647	HMDB01555	249.062	10.3517	-0.962011	-0.962011	0.257011	0.244631	1.42238
185	C_0039	Cys	C00097,C00736,C00793	HMDB00574,HMDB03417	122.026	11.1023	-0.992303	-0.992303	0.367809	0.266008	1.35079
186	A_0071	Lauric acid	C02679	HMDB00638	199.171	7.63934	-0.998067	-0.998067	0.270356	0.390936	1.33484
187	A_0072	N2-Acetylaminoadipic acid	C12986	No ID	202.073	12.1609	-0.986137	-0.986137	0.220109	0.390499	1.36167
188	C_0067	Urocanic acid	C00785	HMDB00301	139.05	8.31184	-0.95657	-0.95657	0.0768358	0.429255	1.40705
189	C_0099	Pyridoxamine	C00534	HMDB01431	169.097	6.0547	-0.669395	-1.09319	-0.0503254	0.310223	1.50269
190	A_0006	3-Hydroxypropionic acid	C01013	HMDB00700	89.0253	10.4709	-0.896376	-0.896376	-0.00699369	0.278011	1.52174
191	C_0169	S-Adenosylmethionine	C00019	HMDB01185	399.143	7.18958	-0.904684	-0.904684	0.0908416	0.196628	1.5219
192	C_0031	3-Amino-2-piperidone	No ID	HMDB00323	115.086	7.6653	-0.893292	-0.893292	0.179016	0.068981	1.53859
193	C_0096	3-Methylguanine	C02230	HMDB01566	166.072	8.48284	-0.827776	-0.827776	0.00164368	0.0326422	1.62127
194	C_0128	SDMA	No ID	HMDB03334	203.149	7.84433	-0.766049	-0.859838	-0.0713571	0.0649012	1.63234
195	C_0090	N6-Methyllysine	C02728	HMDB02038	161.128	7.17237	-0.875301	-0.782767	-0.0674428	0.111795	1.61372
196	A_0003	Glycolic acid	C00160	HMDB00115	75.0095	12.5999	-0.820091	-0.820091	-0.142807	0.168657	1.61433
197	C_0087	Daminozide-1 Ala-Ala	- C00993	- HMDB03459	161.092	9.23991	-0.847957	-0.792154	-0.214063	0.260507	1.59367
198	A_0044	Isovalerylalanine N-Acetylleucine	No ID C02710	HMDB00747 HMDB11756	172.098	7.98975	-0.87622	-0.714871	-0.245811	0.220715	1.61619
199	A_0019	5-Oxo-2-tetrahydrofurancarboxylic acid	No ID	No ID	129.02	10.2174	-0.942383	-0.75539	-0.112869	0.238483	1.57216
200	C_0049	Agmatine	C00179	HMDB01432	131.129	5.30455	-0.943991	-0.773144	-0.149306	0.322059	1.54438
201	C_0054	Leu	C00123,C01570,C16439	HMDB00687	132.101	10.2182	-0.921561	-0.737284	-0.286579	0.410275	1.53515
202	A_0073	5-Methoxyindoleacetic acid	C05660	HMDB04096	204.067	8.20209	-0.948391	-0.681978	-0.288426	0.362998	1.5558
203	A_0053	Homovanillic acid	C05582	HMDB00118	181.052	8.2525	-1.01878	-0.558271	-0.256009	0.243923	1.58914
204	A_0086	Glucose 1-phosphate	C00103	HMDB01586	259.023	10.0769	-0.84444	-0.575357	-0.304216	0.0321778	1.69183
205	C_0042	Imidazole-4-acetic acid	C02835	HMDB02024	127.05	8.06535	-0.881558	-0.561059	-0.225206	-0.0223989	1.69022
206	C_0048	N-Acetylputrescine	C02714	HMDB02064	131.117	8.476	-0.848514	-0.650356	-0.181505	-0.000136047	1.68051
207	C_0047	trans-Glutaconic acid	C02214	HMDB00620	131.033	21.0141	-0.759942	-0.693988	-0.250626	0.00809187	1.69646
208	C_0106	Citrulline	C00327	HMDB00904	176.103	10.8818	-0.812893	-0.64962	-0.264673	0.0403178	1.68687
209	C_0050	Hydroxyproline	C01157	HMDB00725	132.066	11.7711	-0.800635	-0.689726	-0.31175	0.138733	1.66338
210	C_0033	Val	C00183,C06417,C16436	HMDB00883	118.086	9.94569	-0.788251	-0.7192	-0.34545	0.210402	1.6425
211	A_0094	N-Acetylglucosamine 1-phosphate	C04256	HMDB01367	300.05	9.5175	-0.732009	-0.732009	-0.409048	0.227021	1.64605
212	A_0062	N-Acetylglutamic acid	C00624	HMDB01138	188.057	13.156	-0.736754	-0.684983	-0.428446	0.18589	1.66429
213	C_0094	Pterin	C00715	HMDB00802	164.056	10.0806	-0.719009	-0.719009	-0.317954	0.0645857	1.69139
214	C_0097	Phe	C00079,C02057,C02265	HMDB00159	166.086	10.9175	-0.724378	-0.66539	-0.373798	0.0639437	1.69962
215	A_0047	N-Acetylaspartic acid	C01042	HMDB00812	174.042	14.5597	-0.659007	-0.659007	-0.412293	0.0094518	1.72086
216	A_0037	Terephthalic acid	C06337	HMDB02428	165.021	16.5642	-0.619252	-0.678189	-0.473802	0.0599557	1.71129
217	C_0036	Homoserine	C00263	HMDB00719	120.065	9.98595	-0.631935	-0.703915	-0.447594	0.0810186	1.70243
218	C_0111	Tyr	C00082,C01536,C06420	HMDB00158	182.08	11.1588	-0.689291	-0.647648	-0.485086	0.133121	1.6889
219	C_0083	His	C00135,C00768,C06419	HMDB00177	156.076	7.36212	-0.641047	-0.589792	-0.505132	0.00797142	1.728
220	C_0075	Lys	C00047,C00739,C16440	HMDB00182,HMDB03405	147.112	6.96698	-0.584237	-0.552802	-0.569886	-0.032966	1.73989
221	C_0123	2,6-Diaminopimelic acid	C00666	HMDB01370	191.102	8.8548	-0.591434	-0.585781	-0.441279	-0.140115	1.75861
222	C_0084	Imidazolelactic acid	C05568	No ID	157.06	8.83212	-0.570582	-0.570582	-0.426188	-0.200941	1.76829
223	C_0027	Cytosine	C00380	HMDB00630	112.05	7.32861	-0.6046	-0.556836	-0.382651	-0.224418	1.7685
224	A_0059	XA0017	-	-	186.114	7.83729	-0.614392	-0.589067	-0.367932	-0.190398	1.76179
225	A_0032	2-Hydroxyglutaric acid	C02630,C01087,C03196	HMDB00606,HMDB00694	147.031	16.7806	-0.614624	-0.623298	-0.394444	-0.118119	1.75049
226	A_0033	2,5-Dihydroxybenzoic acid	C00628	HMDB00152	153.019	9.47279	-0.622238	-0.622238	-0.379664	-0.126701	1.75084
227	A_0026	Threonic acid	C01620	HMDB00943	135.031	9.22447	-0.677469	-0.579222	-0.334685	-0.160158	1.75153
228	A_0010	3-Hydroxybutyric acid	C01089,C03197	HMDB00011,HMDB00357,HMDB00442	103.04	9.46832	-0.703578	-0.621416	-0.342974	-0.0632705	1.73124
229	C_0120	N6,N6,N6-Trimethyllysine	C03793	HMDB01325	189.158	7.25495	-0.688891	-0.622247	-0.308454	-0.120676	1.74027
230	C_0125	DOPA	C00355	HMDB00181,HMDB00609	198.076	11.4478	-0.676488	-0.648007	-0.276214	-0.139066	1.73978
231	A_0005	Isobutyric acid Butyric acid	C02632 C00246	HMDB01873 HMDB00039	87.0457	9.85621	-0.67596	-0.662167	-0.237585	-0.1626	1.73831
232	A_0009	Isovaleric acid Valeric acid	C08262 C00803	HMDB00718 HMDB00892	101.062	9.18865	-0.69632	-0.640071	-0.156409	-0.245255	1.73805
233	C_0117	N6-Acetyllysine	C02727	HMDB00206	189.123	11.2362	-0.66915	-0.548965	-0.203755	-0.337516	1.75939
234	C_0089	Tryptamine	C00398	HMDB00303	161.108	8.35276	-0.618976	-0.618976	-0.258245	-0.263769	1.75996
235	C_0127	ADMA	C03626	HMDB01539	203.149	7.71929	-0.568695	-0.666453	-0.277116	-0.246905	1.75917
236	C_0037	2-Methylserine	C02115	No ID	120.065	10.254	-0.514446	-0.523447	-0.458491	-0.284172	1.78056
237	C_0007	Isopropanolamine	C03194,C05771	HMDB12136	76.076	7.1029	-0.447214	-0.447214	-0.447214	-0.447214	1.78885
238	A_0020	Citraconic acid	C02226	HMDB00634	129.02	16.8382	-0.447214	-0.447214	-0.447214	-0.447214	1.78885
239	A_0111	Digalacturonic acid	C02273	No ID	369.07	9.53011	-0.447214	-0.447214	-0.447214	-0.447214	1.78885
240	A_0114	FAD_divalent	C00016	HMDB01248	391.571	7.85697	-0.447214	-0.447214	-0.447214	-0.447214	1.78885
241	A_0042	Glycerol 2-phosphate	C02979	No ID	171.006	12.629	-0.447214	-0.447214	-0.447214	-0.447214	1.78885
242	A_0008	Tiglic acid	C08279	HMDB01470	99.0462	9.66397	-0.447214	-0.447214	-0.447214	-0.447214	1.78885
243	C_0155	Homocystine	C01817	HMDB00575,HMDB00676	269.062	9.58448	-0.447214	-0.447214	-0.447214	-0.447214	1.78885
244	C_0065	Anthranilic acid	C00108	HMDB01123	138.055	10.482	-0.447214	-0.447214	-0.447214	-0.447214	1.78885
245	C_0063	1-Methylnicotinamide	C02918	HMDB00699	137.071	7.41752	-0.447214	-0.447214	-0.447214	-0.447214	1.78885
246	C_0026	o-Aminophenol	C01987	No ID	110.06	7.61972	-0.447214	-0.447214	-0.447214	-0.447214	1.78885
247	C_0104	N5-Ethylglutamine	C01047	No ID	175.107	11.1745	-0.35684	-0.470657	-0.52228	-0.435837	1.78561
248	C_0130	Trp	C00078,C00525,C00806	HMDB00929	205.096	10.8483	-0.246631	-0.433139	-0.563337	-0.53204	1.77515
249	C_0002	Ethanolamine	C00189	HMDB00149	62.0603	6.44699	-0.240973	-0.817104	-0.237469	-0.442791	1.73834
250	C_0124	Glucosaminic acid	C03752	No ID	196.082	11.6773	-0.227046	-1.06747	-0.340075	-0.00652237	1.64112
251	C_0142	Cystine	C00491,C01420	HMDB00192	241.03	10.8184	-0.392118	-0.741974	-0.741974	0.236114	1.63995
252	C_0028	Histamine	C00388	HMDB00870	112.086	4.89852	-0.414827	-0.622721	-0.735472	0.0718262	1.70119
253	C_0032	Pro	C00148,C00763,C16435	HMDB00162,HMDB03411	116.07	10.6606	-0.673902	-0.406857	-0.758934	0.174156	1.66554
254	A_0051	N-Formylmethionine	C03145	HMDB01015	176.04	8.61063	-0.639951	-0.639951	-0.639951	0.278581	1.64127
255	C_0161	Ophthalmic acid	No ID	HMDB05765	290.133	12.8373	-0.655949	-0.655949	-0.655949	0.362238	1.60561
256	C_0015	3-Aminopropane-1,2-diol	C06057	No ID	92.0703	7.43254	-0.658456	-0.658456	-0.658456	0.37602	1.59935
257	A_0034	Dihydroorotic acid	C00337	HMDB00528	157.025	9.36693	-0.677537	-0.677537	-0.677537	0.488536	1.54407
258	A_0090	Sulfotyrosine	No ID	No ID	260.025	8.29695	-0.677854	-0.677854	-0.677854	0.49054	1.54302
259	A_0027	o-Hydroxybenzoic acid	C00805	HMDB01895	137.023	10.4027	-0.679496	-0.679496	-0.679496	0.501007	1.53748
260	C_0095	Methionine sulfoxide	C02989	HMDB02005	166.053	11.6015	-0.733164	-0.635591	-0.675372	0.515536	1.52859
261	A_0048	N-Carbamoylaspartic acid	C00438	HMDB00828	175.037	15.4712	-0.695468	-0.695468	-0.695468	0.611677	1.47473
262	C_0053	Ile	C00407,C06418,C16434	HMDB00172	132.101	10.1266	-0.814984	-0.732655	-0.50221	0.55277	1.49708
263	A_0060	N-Acetylglutamine	No ID	HMDB06029	187.073	8.10716	-0.839001	-0.734235	-0.467435	0.542678	1.49799
264	C_0118	N-Acetyllysine	C12989	HMDB00446	189.123	9.72662	-0.860194	-0.754919	-0.42803	0.563456	1.47969
265	C_0056	Alloisoleucine	No ID	HMDB00557	132.102	10.359	-0.877136	-0.779754	-0.353663	0.51723	1.49332
266	C_0126	N-Acetylhistidine	C02997	No ID	198.087	9.7545	-0.872416	-0.823271	-0.288691	0.487759	1.49662
267	A_0030	4-Acetamidobutanoic acid	C02946	HMDB03681	144.068	8.46306	-0.865735	-0.865735	-0.335789	0.679037	1.38822
268	C_0098	3-Methoxytyramine	C05587	HMDB00022	168.103	8.71694	-0.892127	-0.892127	-0.272823	0.698382	1.35869
269	C_0079	Met	C00073,C00855,C01733	HMDB00696	150.058	10.5891	-0.973978	-0.767667	-0.34504	0.755357	1.33133
270	C_0122	Gly-Asp	No ID	No ID	191.066	9.81171	-0.860097	-0.691314	-0.568786	0.735149	1.38505
271	C_0019	N,N-Dimethylglycine	C01026	HMDB00092	104.07	10.7606	-0.72173	-0.72173	-0.72173	0.86662	1.29857
272	A_0022	N-Acetyl-β-alanine	C01073	No ID	130.051	9.0196	-0.721783	-0.721783	-0.721783	0.867355	1.29799
273	C_0012	Ala	C00041,C00133,C01401	HMDB00161,HMDB01310	90.0551	9.00763	-0.277449	-0.724741	-1.05567	0.740907	1.31696
274	C_0021	2-Aminoisobutyric acid 2-Aminobutyric acid	C03665 C02261,C02356	HMDB01906 HMDB00452	104.071	9.58387	-0.0810395	-1.05085	-0.767508	0.451599	1.4478
275	C_0059	Asp	C00049,C00402,C16433	HMDB00191,HMDB06483	134.045	11.3331	0.547165	-1.56538	0.0851818	-0.16897	1.102
276	C_0060	S-Methylcysteine	No ID	HMDB02108	136.042	11.3265	0.381977	-1.62535	0.441601	-0.188978	0.990753
ID consists of analysis mode and number. 'C' and 'A' showed cation and anion modes, respectively.
† Putative metabolites which were assigned on the basis of m/z and MT in HMT standard compound library.
§ Standardized value of relative area in detected peaks. The Values of N.D. were regarded as eps (2-52).
The order of samples and metabolites in this table corresponded to those of HeatMap.
